# Supplementary material for: Characterization of Polyhydroxybutyrate-Based Composites Prepared by Injection Molding
Source: Polymers (Basel). 2021 Dec 18;13(24):4444. doi: 10.3390/polym13244444 (PMC8704503; doi:10.3390/polym13244444)
Supplement: Supplementary file 1 [file polymers-13-04444-s001.zip › polymers-1469945-supplementary.pdf]

Supplementary Information

# Characterization of Polyhydroxybutyrate-Based Composites Prepared by Injection Molding

Marcos M. Hernandez, Nevin S. Gupta, Kwan-Soo Lee, Aaron C. Pital, Babetta L. Marrone, Carl N. Iverson and Joseph H. Dumont \*

Los Alamos National Laboratory, Los Alamos, NM 87545, USA; mhernandez@lanl.gov (M.M.H.); nevin5@lanl.gov (N.S.G.); kslee@lanl.gov (K.-S.L.); acpital@lanl.gov (A.C.P); blm@lanl.gov (B.L.M.); iverson@lanl.gov (C.N.I.)

\* Correspondence: joseph.dumont@lanl.gov

**Citation:** Hernandez, M.M.; Gupta, N.S.; Lee, K.-S.; Pital, A.C.; Marrone, B.L.; Iverson, C.N. Characterization of Polyhydroxybutyrate-Based Composites Prepared by Injection Molding. *Polymers* **2021**, *13*, 4444. <https://doi.org/10.3390/polym13244444>

Academic Editors: Domenico Acerno and Antonella Patti

Received: 2 November 2021

Accepted: 13 December 2021

Published: 18 December 2021

**Publisher's Note:** MDPI stays neutral with regard to jurisdictional claims in published maps and institutional affiliations.

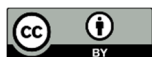

**Copyright:** © 2021 by the authors. Licensee MDPI, Basel, Switzerland. This article is an open access article distributed under the terms and conditions of the Creative Commons Attribution (CC BY) license

(<https://creativecommons.org/licenses/by/4.0/>).

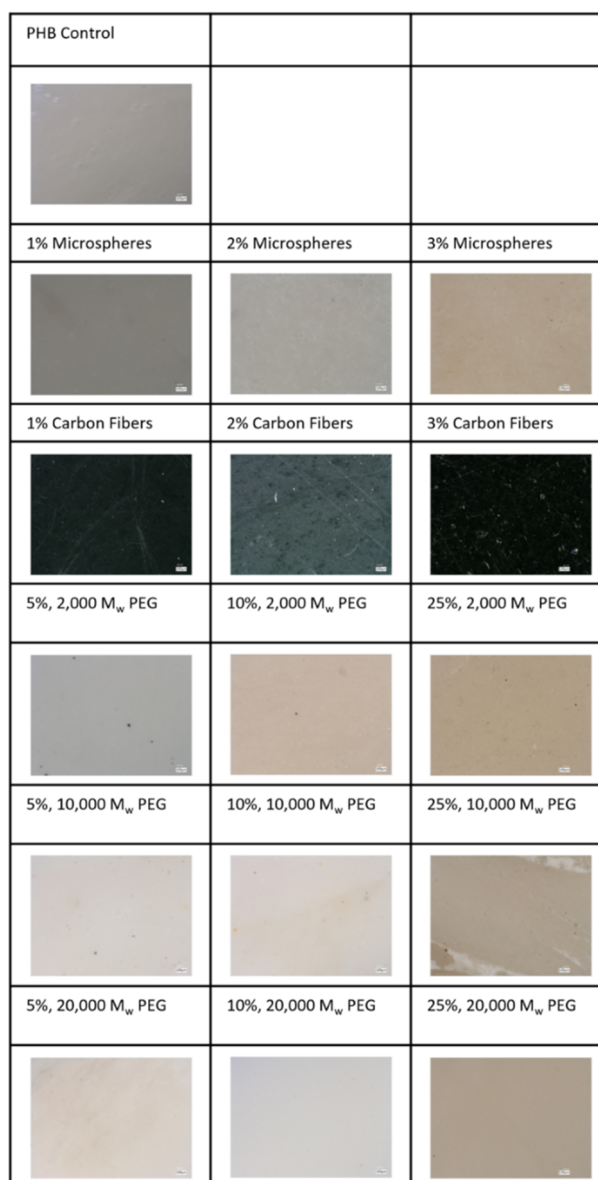

**Figure S1.** PHB composite sample surface at 100x under full ring lighting.

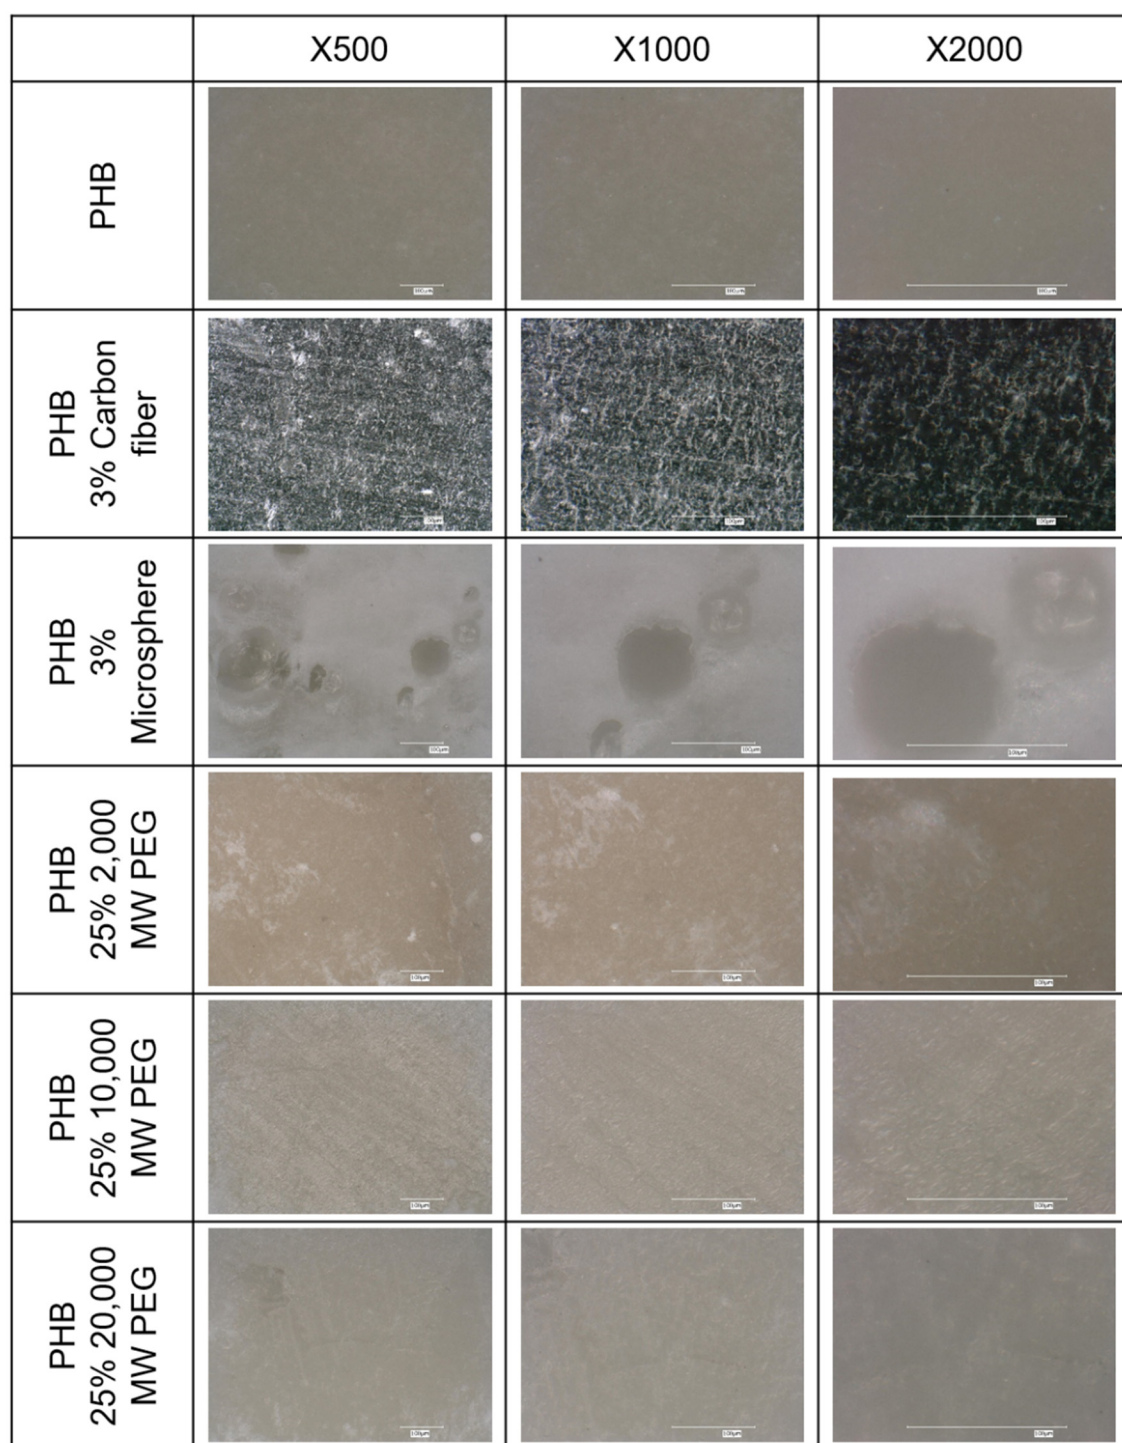

**Figure S2.** High resolution confocal photographs of PHB composite samples at 500x, 1000x, and 2,000x

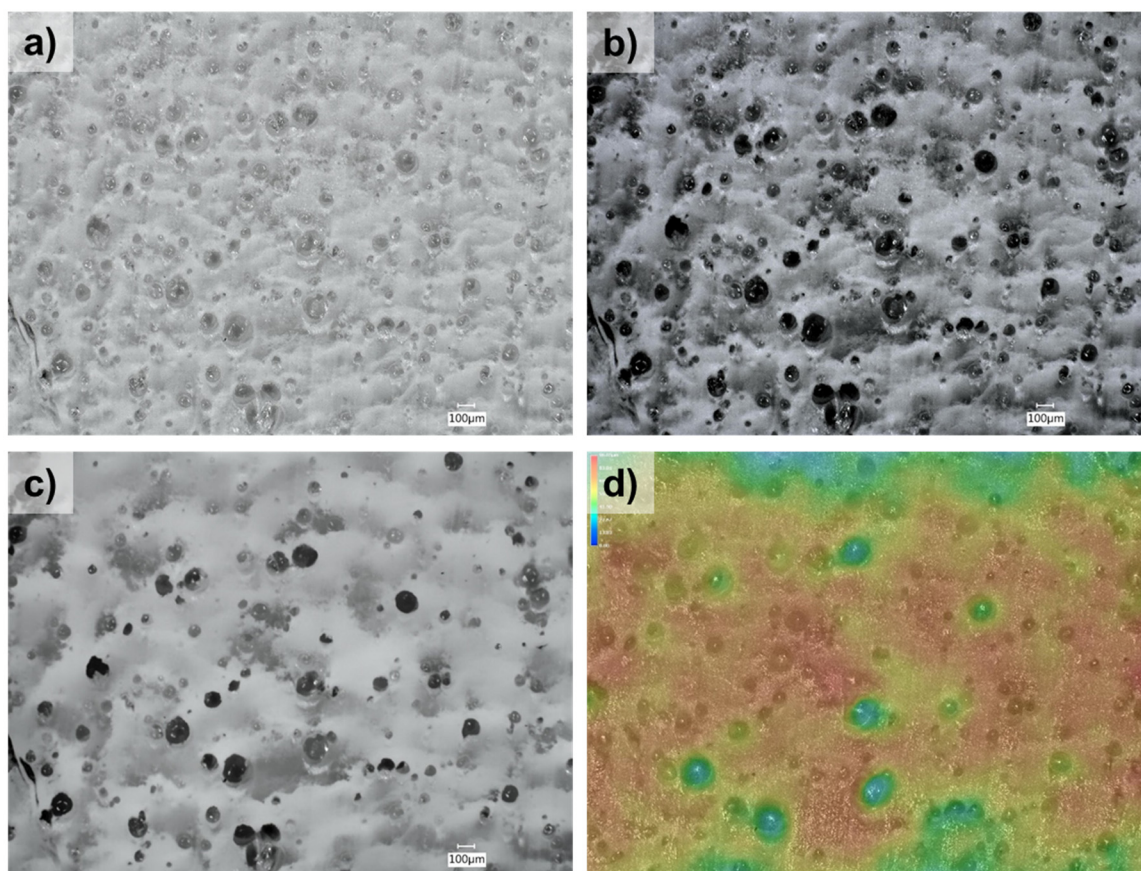

**Figure S3.** Surface morphology photographs of 3% microsphere/PHB composites at 100x. a) No treatment to the image, b) High definition, with increased contrast, c) High definition, with increased contrast, and smooth surface and d) 3D rendering of image b)

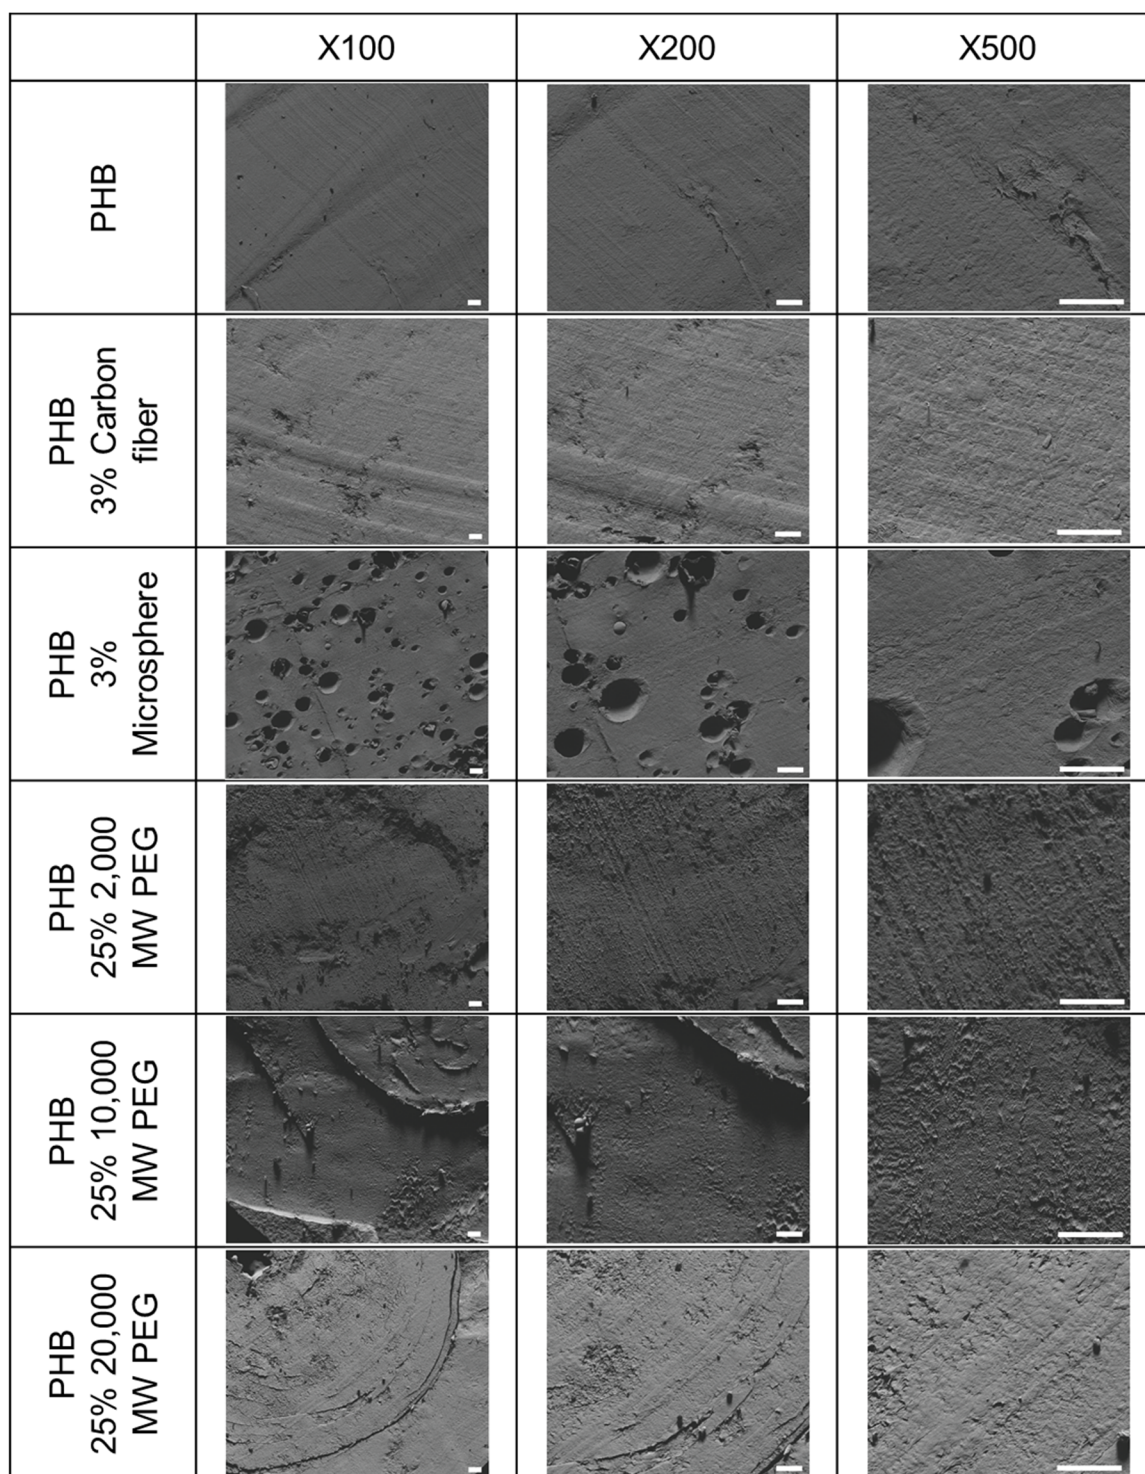

**Figure S4.** SEM images of PHB samples prepared by single screw extruder. The scale bar represents 100  $\mu\text{m}$ .

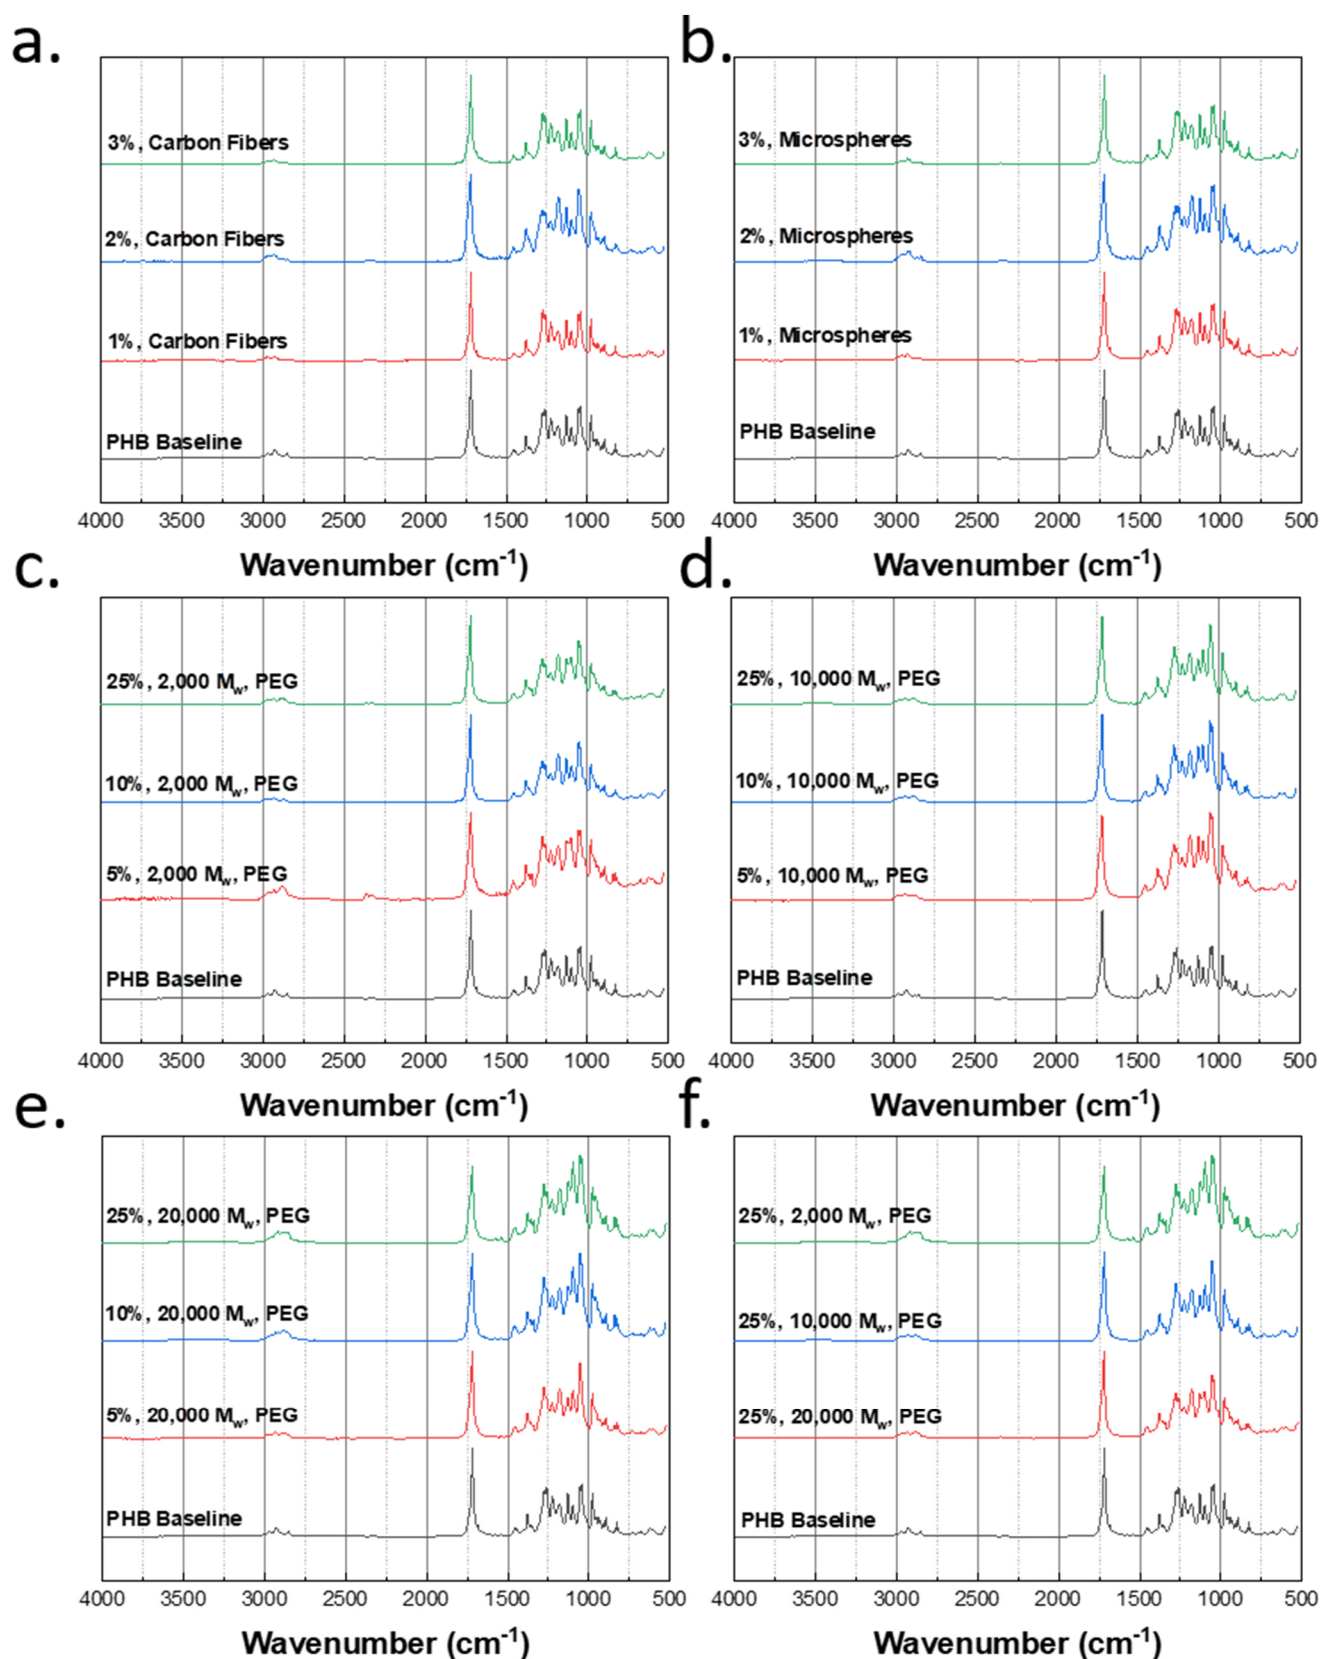

Figure S5. IR Spectra for PHB composite samples

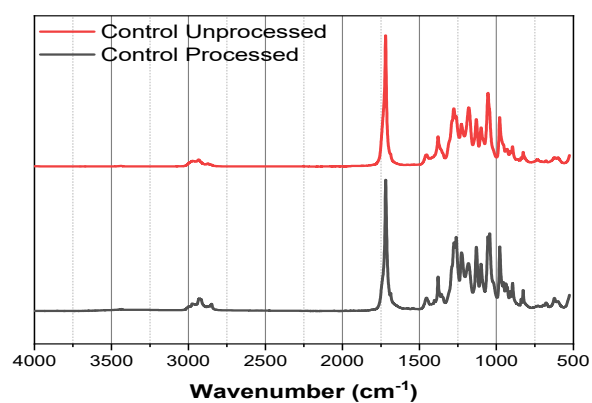

**Figure S6.** FTIR spectra of both processed and unprocessed PHB.

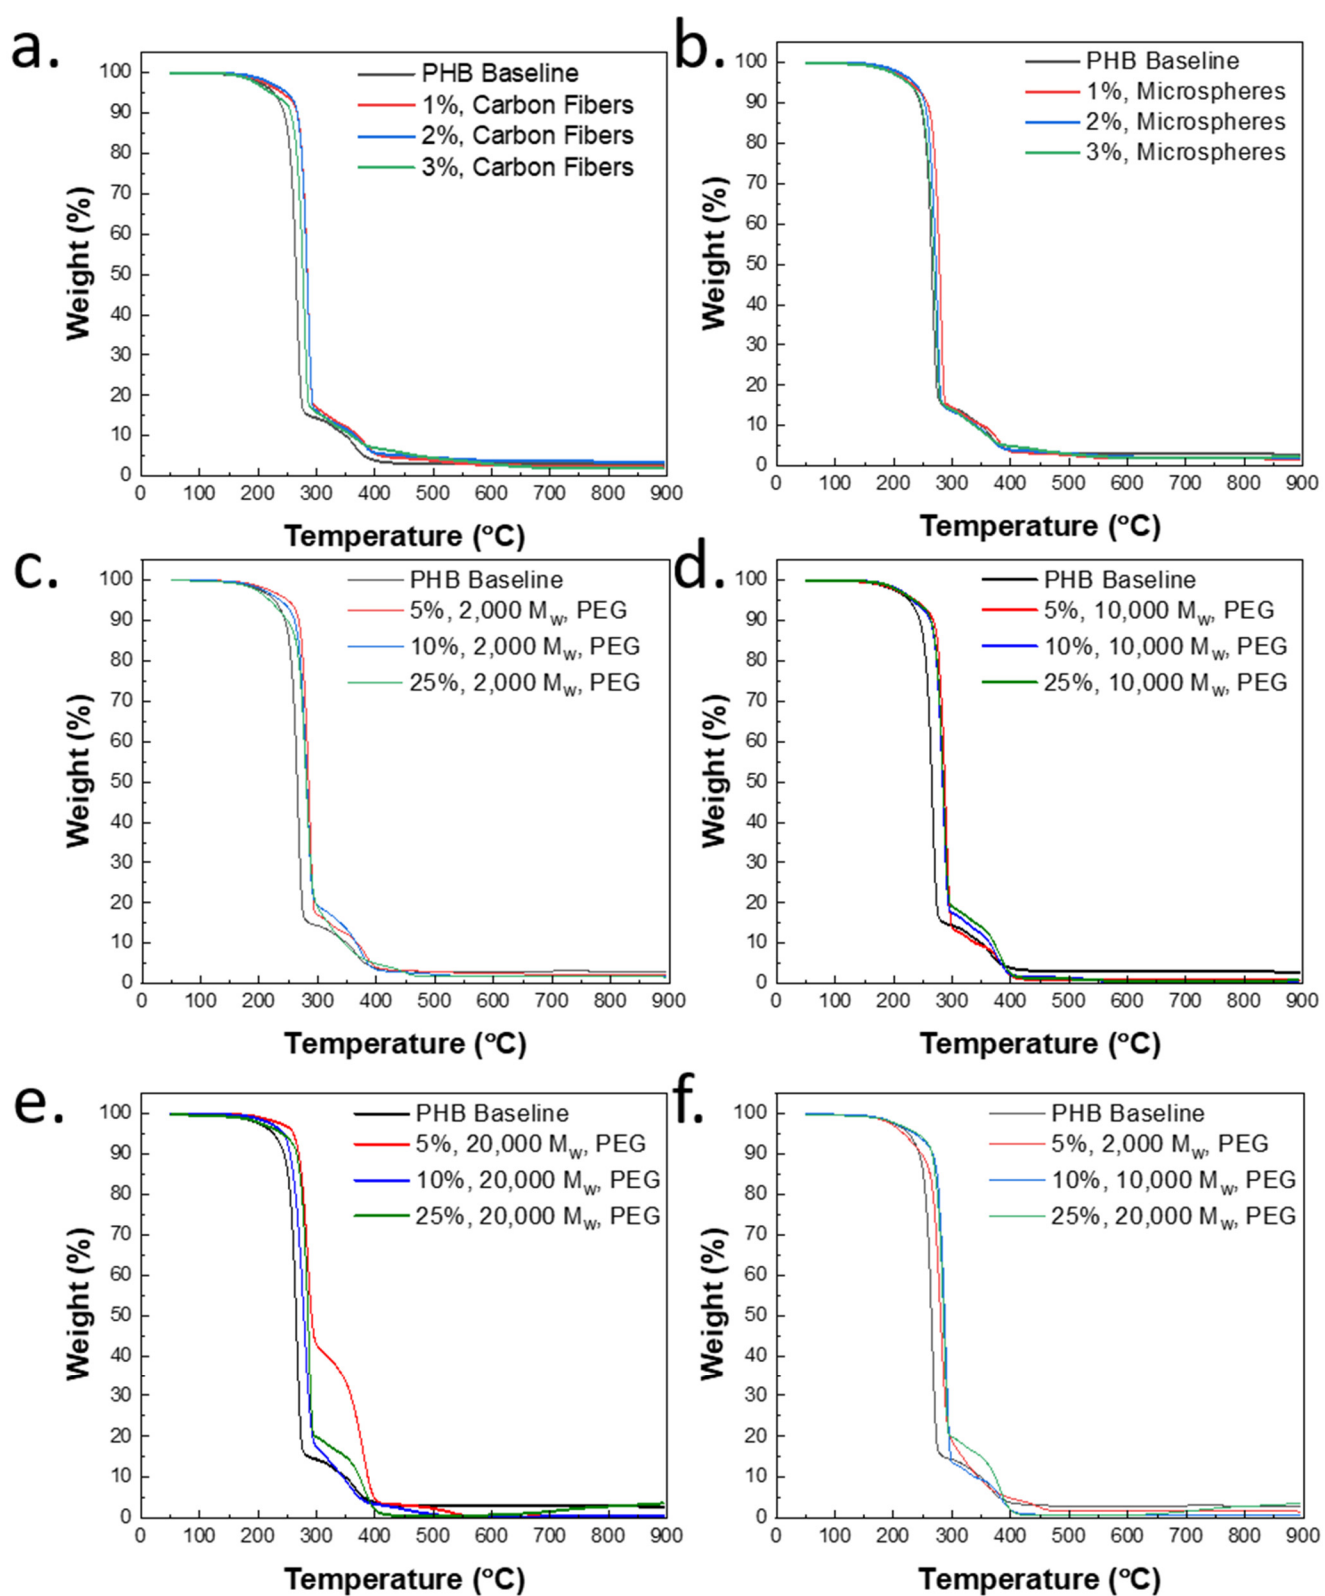

Figure S7. TGA curves for PHB composites.

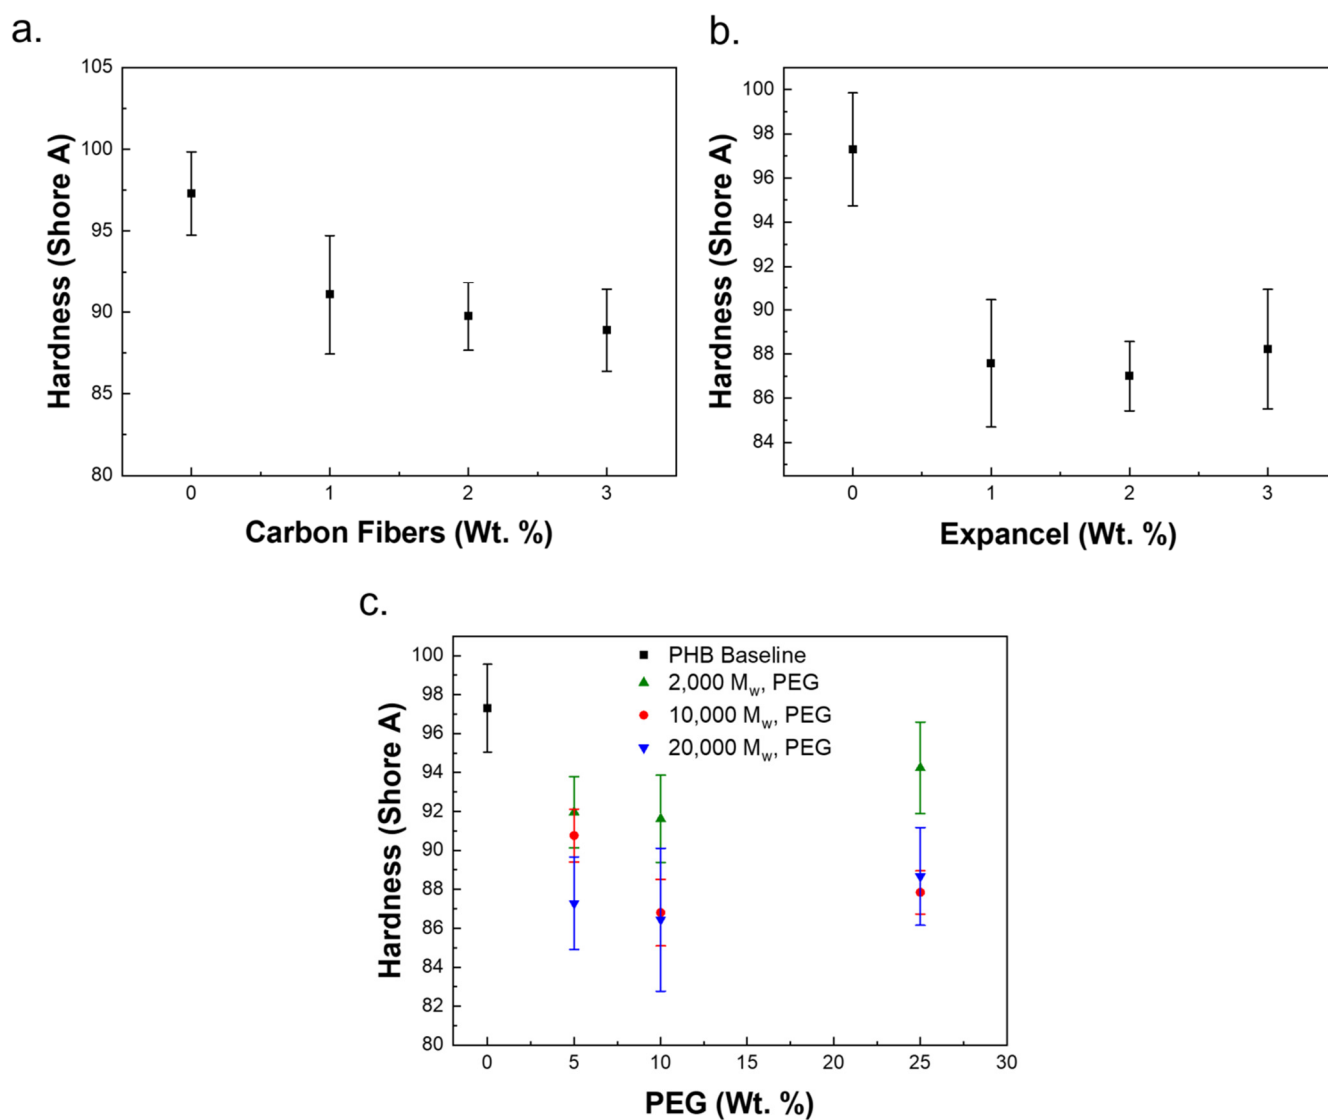

Figure S8. Shore A hardness for PHB composites

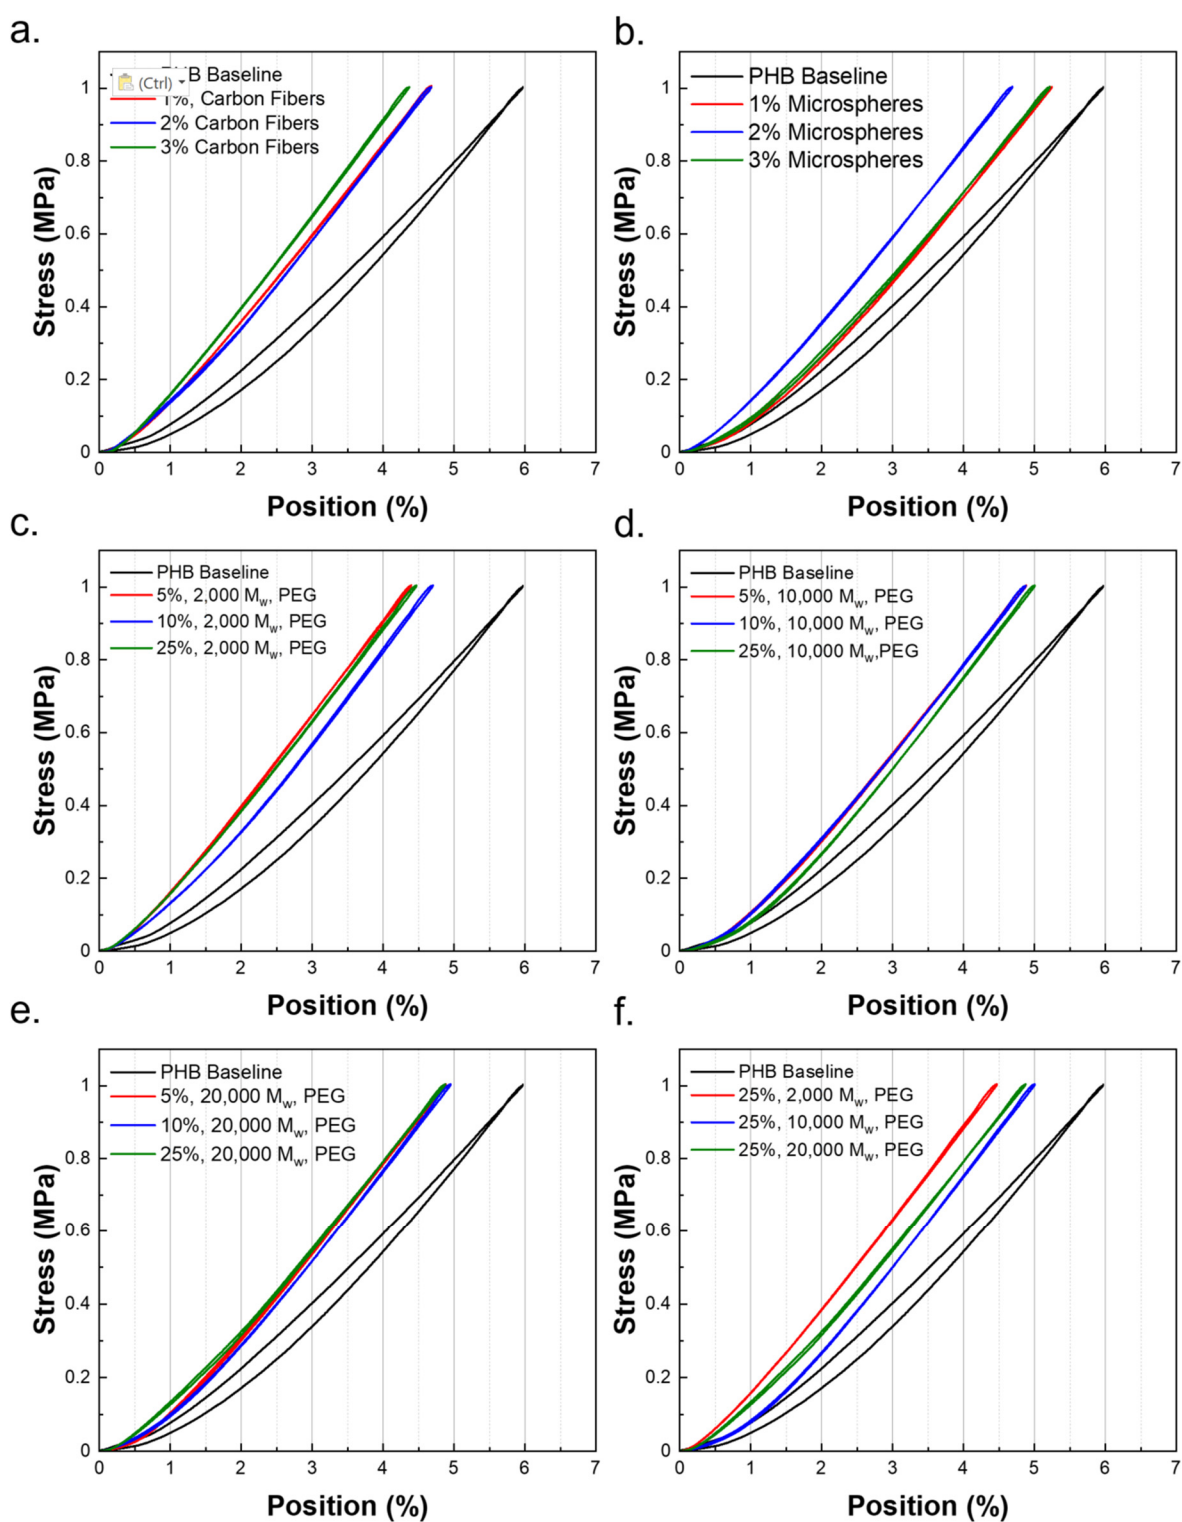

Figure S9. Stress/strain diagrams for PHB composites

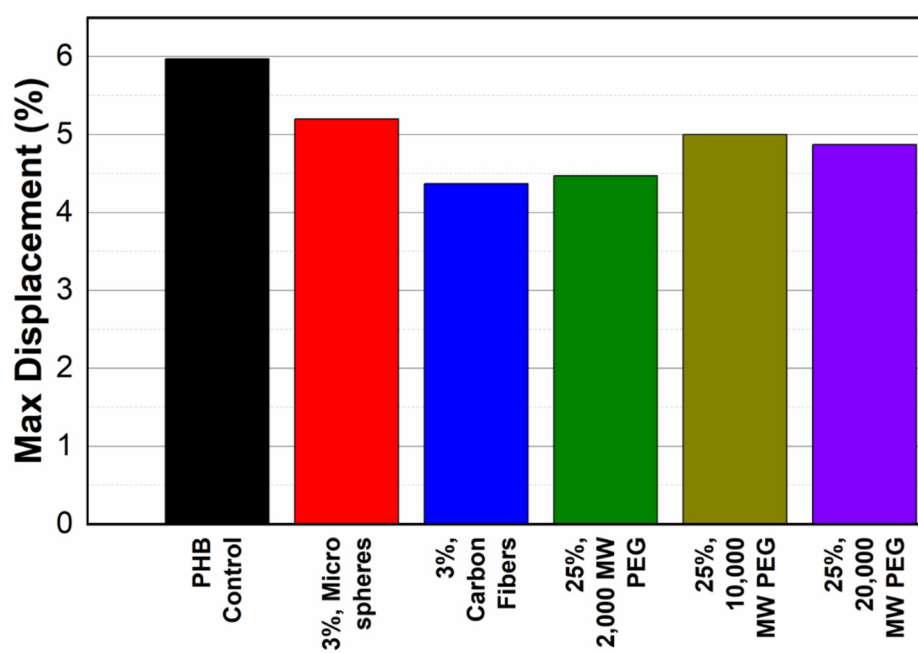

Figure S10. Maximum displacement diagram for PHB composites
